# 1 **High levels of antibiotic resistance gene expression among** 2 **birds living in a wastewater treatment plant**

3

4 Vanessa R. Marcelino<sup>a,b,c</sup>, Michelle Wille<sup>d</sup>, Aeron C. Hurt<sup>d</sup>, Daniel González-Acuña<sup>e</sup>, Marcel  
5 Klaassen<sup>f</sup>, John-Sebastian Eden<sup>a,b,c</sup>, Mang Shi<sup>a,c</sup>, Jonathan R. Iredell<sup>a,b</sup>, Tania C. Sorrell<sup>a,b</sup>,  
6 Edward C. Holmes<sup>a,c</sup>.

7

8 <sup>a</sup>Marie Bashir Institute for Infectious Diseases and Biosecurity, Sydney Medical School, The  
9 University of Sydney, Sydney, NSW 2006, Australia.

10 <sup>b</sup>Westmead Institute for Medical Research, Westmead, NSW 2145, Australia.

11 <sup>c</sup>School of Life & Environmental Sciences, Charles Perkins Centre, The University of  
12 Sydney, Sydney, NSW 2006, Australia.

13 <sup>d</sup>WHO Collaborating Centre for Reference and Research on Influenza, at The Peter Doherty  
14 Institute for Infection and Immunity, Melbourne, VIC 3000, Australia.

15 <sup>e</sup>Laboratorio de Parásitos y Enfermedades de Fauna Silvestre, Facultad de Ciencias  
16 Veterinarias, Universidad de Concepción, Concepción 3349001, Chile.

17 <sup>f</sup>Centre for Integrative Ecology, School of Life and Environmental Sciences, Deakin  
18 University, Geelong, VIC 3216, Australia.

19

20 **Short title:** Antibiotic resistance goes wild

21

22 **Corresponding Author:** Vanessa R. Marcelino, Marie Bashir Institute for Infectious  
23 Diseases and Biosecurity, Sydney Medical School, The University of Sydney, Sydney, NSW  
24 2006, Australia. Phone: (+61) 02 86273432. E-mail: [vanessa.marcelino@sydney.edu.au](mailto:vanessa.marcelino@sydney.edu.au)

25

26

27 **Keywords:** Metatranscriptomics, Microbiome, Birds, Resistome, Antimicrobial resistance.

28

29

30

31 **Abstract**

32 Antibiotic resistance is rendering common bacterial infections untreatable. Wildlife can  
33 incorporate and disperse antibiotic resistant bacteria in the environment, such as water  
34 systems, which in turn serve as reservoirs of resistance genes for human pathogens. We  
35 used bulk RNA-sequencing (meta-transcriptomics) to assess the diversity and expression  
36 levels of functionally active resistance genes in the microbiome of birds with aquatic  
37 behavior. We sampled birds across a range of habitats, from penguins in Antarctica to ducks  
38 in a wastewater treatment plant in Australia. This revealed 81 antibiotic resistance genes in  
39 birds from all localities, including  $\beta$ -lactam, tetracycline and chloramphenicol resistance in  
40 Antarctica, and genes typically associated with multidrug resistance plasmids in areas with  
41 high human impact. Notably, birds feeding at a wastewater treatment plant carried the  
42 greatest resistance gene burden, suggesting that human waste, even if it undergoes  
43 treatment, contributes to the spread of antibiotic resistance genes to the wild. Differences in  
44 resistance gene burden also reflected the birds' ecology, taxonomic group and microbial  
45 functioning. Ducks, which feed by dabbling, carried a higher abundance and diversity of  
46 resistance genes than turnstones, avocets and penguins, that usually prey on more pristine  
47 waters. In sum, this study helps to reveal the complex factors explaining the distribution of  
48 resistance genes and their exchange routes between humans and wildlife.

49

## 50 Introduction

51 Tons of antibiotics are used annually in clinical and agricultural settings worldwide. Food  
52 animals alone consumed over 130,000 tons of antibiotics in 2013 (1), and antibiotic usage  
53 by humans increased 65% between 2000 and 2015, reaching 34.8 billion defined daily  
54 doses (2). The resulting proliferation and spread of bacteria that are resistant to antibiotics  
55 poses a major health and economic threat (3). Genes for the production of antibiotics and  
56 antibiotic resistance determinants are naturally found in some microbial species and their  
57 presence in the environment is not necessarily an indication of human impact (4, 5).  
58 However, the use of antibiotics in clinical and agricultural settings selects for bacteria  
59 carrying resistance genes. When these genes are encoded in mobile elements, such as  
60 plasmids and conjugative transposons, they can be readily transmitted via horizontal gene  
61 transfer between environmental bacteria and clinically important pathogens (i.e. acquired  
62 resistance genes). Multiple resistance genes can be present in a single mobile element and  
63 the spread of plasmid-borne resistance has jeopardized the efficacy of many antibiotics,  
64 including  $\beta$ -lactam drugs of last resort (6, 7).

65 Both the environment and wildlife are major sources and reservoirs of resistance  
66 gene diversity (8, 9). The ecological niches and behavior of birds make them particularly  
67 likely to transport antibiotic resistant bacteria. Migrating bird species transport pathogens  
68 which may contain antibiotic resistance genes across large distances (10, 11). Birds also  
69 serve as sensitive bioindicators of environmental contamination with antibiotic resistant  
70 bacteria (10, 12-16). For instance, ESBL-producing *Escherichia coli* were found to occur  
71 over 3 times more frequently in gulls than in humans in the same region (15). Bacteria  
72 resistant to  $\beta$ -lactam and tetracycline drugs are commonly found in the gut microbiome of  
73 birds, especially in scavenging and aquatic species, such as waterfowl, gulls and waders  
74 (10, 12, 14, 17-20). Aquatic bird species likely acquire these genes through contact with  
75 contaminated water. Human sewage is enriched in antibiotic-resistant bacteria, which are  
76 only partially removed during the water treatment process (21-26). Birds in contact with  
77 wastewater treatment influents or effluents could therefore be at increased risk of acquiring  
78 these genes, although empirical data to support this idea are scarce (8).

79 While the majority of studies on birds were based on *in vitro* assessments of bacterial  
80 cultures, the development of culture-independent sequencing techniques has substantially  
81 expanded our knowledge of the environmental reservoir of resistance genes (7, 9, 27-32).  
82 Among these techniques, sequencing the entire set of transcribed (i.e. expressed) genes via  
83 'meta-transcriptomics' has rarely been used in the context of antibiotic resistance, despite its  
84 advantages. In particular, use of meta-transcriptomics allows data to be obtained from the  
85 entire microbial population, with a focus on functionally active genes. This is important  
86 because genetic material is a metabolic burden and genes that are not essential tend to be

87 lost (33-36). In the absence of antibiotics, it is likely that resistance genes are regularly lost  
88 by bacteria, either by large deletions or gradual deactivation (erosion). Other high-  
89 throughput techniques, such as DNA-based metagenomics, cannot distinguish recently  
90 deactivated resistance genes from their functional relatives. An alternative is to clone inserts  
91 from environmental strains into cultivable vectors (e.g. *E. coli*), select for resistance *in vitro*  
92 and then sequence their genomes (e.g. 17, 22). However, this approach can result in bias  
93 towards genes present in organisms closely related to the cloning vector (7). Meta-  
94 transcriptomics does not have this limitation as the transcripts of all microorganisms are  
95 assessed using bulk RNA sequencing. To our knowledge, only two studies have used meta-  
96 transcriptomics to report on the presence of resistance genes that are functionally active  
97 under natural conditions in human and environmental samples (37, 38).

98 We used meta-transcriptomics to assess the diversity and abundance of antibiotic  
99 resistance genes actively transcribed in the microbiome of water birds of Australia and  
100 penguins in Antarctica. Birds were sampled across a range of habitats, from remote places  
101 in Antarctica and Australia, beaches in Melbourne, the second largest city in Australia, to the  
102 ponds of a waste water treatment plant (WWTP) processing half of Melbourne's sewage. We  
103 specifically tested whether ducks from the WWTP harbor a higher diversity and abundance  
104 of acquired resistance genes, as might be expected given their exposure to partially treated  
105 human waste. Additionally, we explore possible associations between resistance gene  
106 burden and intrinsic bird traits such as feeding behavior, taxonomic order and gut functional  
107 profile (expression of metabolic pathways by the microbiome).

108

## 109 **Results**

110 Microbiome samples from 110 birds, grouped into 11 libraries (Table S1), contained  
111 transcripts corresponding to 81 unique antibiotic resistance genes, previously associated  
112 with phenotypic resistance to nine classes of antibiotics (Fig. 1, Table S2). These results  
113 only include acquired resistance genes, which are most commonly spread among bacteria  
114 via mobile genetic elements, and do not include resistance mediated by chromosomal  
115 mutations (e.g. in housekeeping genes). Resistance to tetracyclines and phenicols  
116 (chloramphenicol and florfenicol) was present in samples from all bird orders and in all  
117 locations, except for one site in Antarctica where phenicol resistance was not detected.

118

119

120

121

122

123

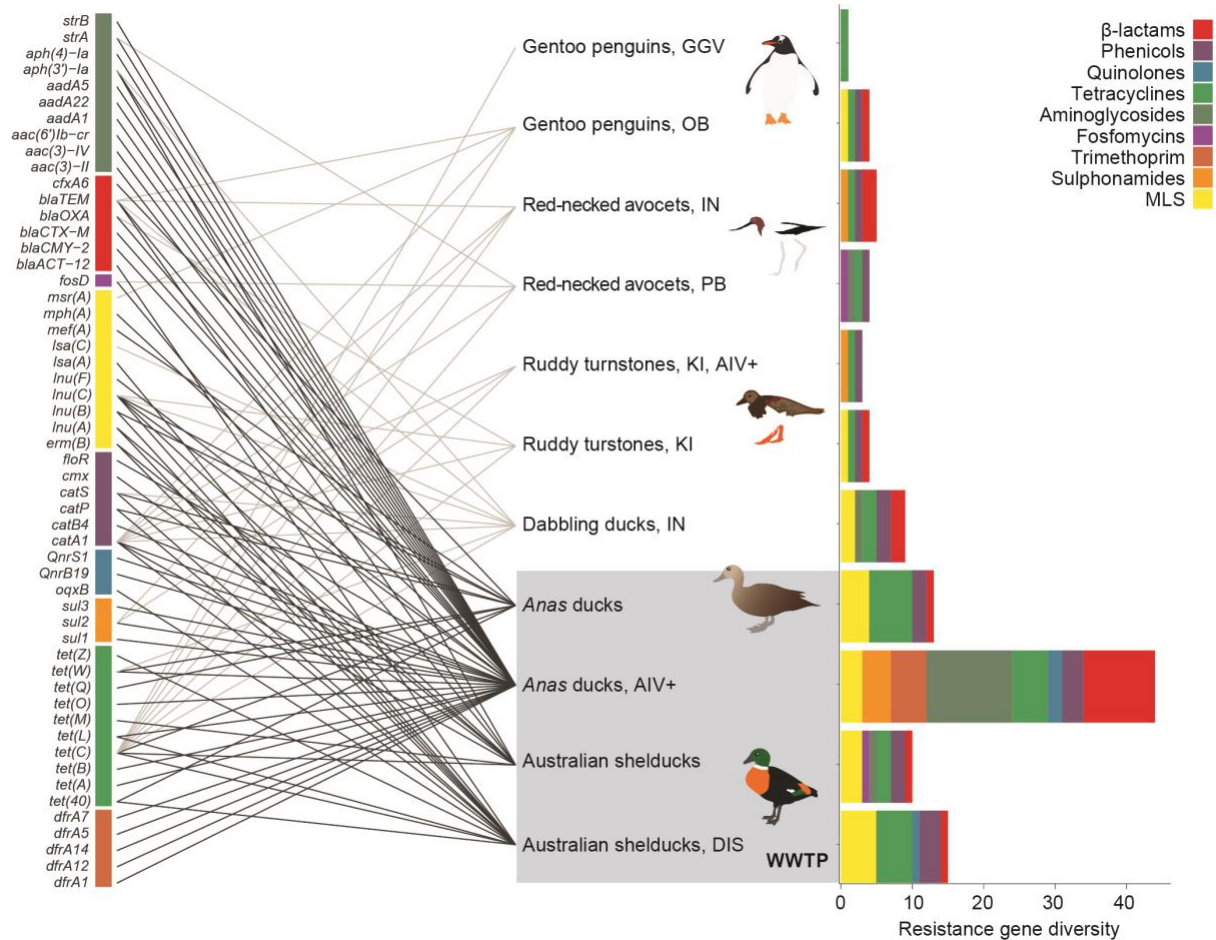

124

125 **Figure 1.** Antibiotic resistance genes expressed in the microbiome of wild birds. The graph  
 126 on the right shows the diversity of resistance genes observed in each library (containing a  
 127 pool of 10 individual birds each), colored by the drug class to which these genes confer  
 128 resistance. Closely related gene variants were merged into one category (see Table S2) for  
 129 representation on the left side of the figure. Lines link genes to the libraries where they were  
 130 found, and dark lines indicate the genes observed in the Wastewater treatment plant  
 131 (WWTP) in Melbourne, Australia. PB = Western Port Bay, Melbourne area, Australia; KI =  
 132 King Island, Bass Strait, Australia; IN = Innamincka reserve, Australia; OB = O'Higgins Base,  
 133 Antarctica; GGV = Gabriel González Videla Base, Antarctica. Libraries of birds infected with  
 134 avian influenza virus are indicated with 'AIV+', and the library of diseased birds is indicated  
 135 with 'DIS'. MLS = Macrolides, Lincosamide and Streptogramin B resistance. Bird drawings:  
 136 M. Wille.

137

138

### 139 *Anthropogenic impact*

140 Birds foraging at the partially treated lagoons of a wastewater treatment plant (the last stage  
 141 of the wastewater treatment process, after aerating and decanting has taken place) had a  
 142 significantly higher diversity and abundance of antibiotic resistant genes, as well as a  
 143 significantly higher number of antibiotic classes against which these genes confer resistance  
 144 (Kruskal-Wallis  $p < 0.05$ , Fig. 2). For simplicity, we refer to 'resistance gene burden' or  
 145 'resistance load' as the resistance gene diversity, abundance (i.e. gene expression levels)  
 146 and number of antibiotic classes to which these genes confer resistance. Most notably,

147 ducks (order Anseriformes) foraging at the WWTP harbored 86% of the resistance gene  
148 diversity observed, most of which occurred exclusively at the WWTP (Figs. 1, 2, Table S2).  
149  
150

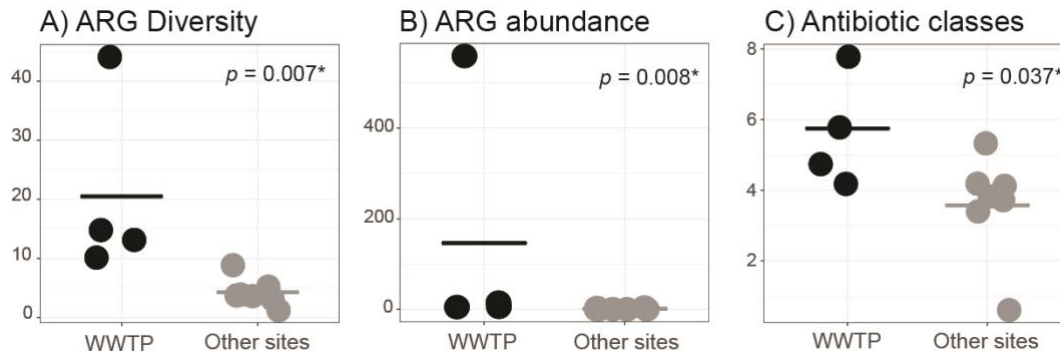

151  
152 **Figure 2.** Diversity and abundance of antibiotic resistance genes (ARG) in birds foraging in  
153 a wastewater treatment plant (WWTP) compared with birds from other sites in Australia and  
154 Antarctica. Differences between groups were assessed with a Kruskal-Wallis test and  $p$ -  
155 values are given. Resistance gene abundances were estimated based on a stably  
156 expressed host gene.  
157  
158

159 When only ducks were considered in comparing the effects of wastewater, we  
160 observed that those from the WWTP carried more resistance genes than ducks from the  
161 remote Innamincka reserve, located in the interior of Australia (Fig. 1, Table S3): ducks from  
162 the Innamincka reserve carried nine resistance genes, fewer than the number observed in  
163 any library from the WWTP (average 20.5, +/-15.8 SD). The abundance of these genes was  
164 also smallest in ducks from Innamincka (2.9, compared with an average of 146.1, +/- 275.2  
165 SD in ducks from the WWTP). The number of antibiotic classes to which these genes confer  
166 resistance did not differ substantially between sites (5 antibiotics in birds from Innamincka,  
167 compared with 5.7, +/- 1.7 in birds from the WWTP).

168 To take into account potential confounding variables, we also analyzed libraries by  
169 individual collection localities (Fig S1), and without including diseased birds or birds infected  
170 with avian influenza in the analyses (Fig. S2). The results consistently indicated that birds  
171 from the WWTP have a higher resistance gene burden than birds from other localities.  
172 Importantly, an additional PCR-based assessment of the resistance genes in individual birds  
173 from two libraries (n=20 samples) confirmed the results obtained using meta-transcriptomics:  
174 we observed 68 resistance gene occurrences (amplifications) in samples from the WWTP  
175 and 12 occurrences in other sites (Kruskal-wallis  $p=0.0023$ , Supplementary Materials, Fig  
176 S3).

177 Samples from gentoo penguins (*Pygoscelia papua*) collected in two localities next to  
178 research bases in Antarctica, contained five resistance genes in total, conferring resistance



179 against  $\beta$ -lactams (*bla*<sub>TEM</sub>), tetracyclines (two variants of *tet*(C)), chloramphenicol (*catA1*)  
180 and erythromycin (*msr*(A)) (Table S2). The erythromycin-resistance gene, which confers  
181 resistance to Macrolides, Lincosamide and Streptogramin B, was observed in penguins only.  
182 Penguins living near the research base with the largest human population (O'Higgins Base)  
183 contained more antibiotic resistance genes (four genes - *bla*<sub>TEM</sub>, *msr*(A), *catA1*, and *tet*(C)),  
184 than those living next to the more remote Gabriel González Videla Base (one *tet*(C) gene).

185

#### 186 *Host traits and functional context*

187 Our sampling design included birds from a range of habitats and species, which will  
188 impact their microbiome and possibly their propensity to carry antibiotic resistance genes.  
189 Shelducks and *Anas* ducks (Anseriiformes) feed by dabbling (filtering water). Turnstones  
190 and avocets (Charadriiformes) commonly prey on invertebrates, and penguins  
191 (Sphenisciformes) prey on fish. Dabbling ducks live in a range of habitats, including nutrient-  
192 rich and heavily altered environments. The majority of ducks analyzed here were sampled at  
193 the WWTP: 40 samples (4 libraries) at the WWTP and 10 samples (1 library) in a pristine  
194 site. Turnstones and penguins on the other hand inhabit pristine habitats. Host taxonomic  
195 order therefore serves as a proxy for the ecology of the birds analyzed here. Our results  
196 indicated that ducks contained the greatest diversity and abundance of resistance genes,  
197 while penguins contained the lowest resistance load (Fig. 1 and Fig. S4).

198 Host ecology is intrinsically linked to microbiome function. By investigating how  
199 microbiomes functionally differ among bird orders and collection sites we can gain insights  
200 into why some hosts harbor more resistance genes than others. We characterized the  
201 metabolic pathways expressed by the microbial community (that is, their functional profile,  
202 Table S4). Some of the metabolic pathways observed were produced by common human  
203 pathogens (e.g. *E. coli*), but a large proportion of the metabolic products (91%) could not be  
204 associated with particular bacterial genera (Table S4). Compared with the human gut, the  
205 microbiome of wild animals is far less characterized, and it is expected that several bacterial  
206 species remain undetected. Principal coordinate analyses showed that ducks (from  
207 Innamincka reserve and from the WWTP) have a distinct microbial metabolism (i.e. set of  
208 metabolic pathways) when compared with birds from other sites (Fig S5). We statistically  
209 assessed the distinctiveness of functional profiles between sites and bird orders using  
210 Random forest analysis, a machine learning approach based on classification trees that has  
211 a suitably high discriminating power for use in microbial ecology (39). This analysis revealed  
212 a clear distinction (zero out-of-bag classification error) in the functional profiles between  
213 birds from the WWTP and other sites, and between Anseriformes and the two other bird  
214 orders that comprised the data set (Charadriiformes and Sphenisciformes; Table S5).

215 The bird microbiome, and consequently its functional profile, can also be affected by  
216 pathogens (40). We sampled birds with avian influenza virus infection and Newcastle  
217 disease symptoms; potential associations between these infections and antibiotic resistance  
218 are discussed in the Supplementary Materials.

219

## 220 Discussion

221 This study shows that clinically important and functional antibiotic resistance genes are  
222 widespread, even in birds from areas as remote as Antarctica, and that the resistance gene  
223 load is significantly higher in birds living in lagoons of a wastewater treatment facility.

224 Although resistance genes can be found in natural environments regardless of human  
225 influence (4, 5), our results indicate that contact with human waste – even if it goes through  
226 sewage treatment – appears to have a strong impact on the acquisition of antibiotic  
227 resistance genes by avian wildlife.

228 The resistance genes observed here encompass the three major resistance  
229 mechanisms of relevance to human infection: (i) drug inactivation, (ii) reduced influx of  
230 antibiotics into bacterial cells or increased efflux from cells and (iii) alteration in, or  
231 overexpression of, the antibiotic target (7, 41). The observed resistance genes conferred  
232 resistance against nine classes of antibiotics (Fig. 1). This number is slightly higher than the  
233 six classes of antibiotic resistance observed in humans, pigs, sponges and environmental  
234 samples in another study using meta-transcriptomics (37). Among the most common were  
235 genes conferring resistance to  $\beta$ -lactam drugs, which is one of the oldest and most widely  
236 used antibiotic classes. Genes conferring resistance to aminoglycosides and tetracyclines  
237 were also common, in agreement with studies reporting these genes in human-impacted  
238 soils and sewage (22, 27, 29, 31).

239 Some of the resistance genes observed are particularly concerning for public health.

240 *bla*<sub>CTX-M</sub> genes, observed exclusively in birds from the WWTP, play a key role in widely  
241 disseminated and highly resistant *E. coli* and *Klebsiella pneumoniae* strains (42). A  
242 fosfomycin resistance gene (*fosD*) was found in birds from metropolitan Melbourne (WWTP  
243 and Western Port Bay). Fosfomycin was discovered over 40 years ago, it is uncommonly  
244 used in humans, but the low resistance levels against this drug have led to a renewed  
245 interest in its therapeutic use (43). One of the bird libraries from the WWTP contained a  
246 florfenicol resistance gene, which was first observed in *Salmonella typhimurium* (44).  
247 Florfenicol is restricted to livestock and veterinary use. It is possible that the presence of this  
248 gene is due to the administration of florfenicol to pets and wildlife within the WWTP  
249 catchment range. The florfenicol gene has been observed co-located with other resistance  
250 genes in integrons and plasmids (44, 45). It is therefore also possible that this gene is found  
251 in the WWTP due to co-selection with other genes. We also found resistance against



252 chemically synthesized antibiotic classes, such as quinolones and sulphonamides, which are  
253 not expected to be widespread in the environment (unlike naturally produced antibiotics such  
254 as penicillin, which is derived from fungi). Quinolone drugs can persist in the environment for  
255 long periods (46) and despite being a synthetic drug, the origins of quinolone resistance  
256 were traced back to aquatic bacterial species (47). Therefore it is perhaps unsurprising that  
257 these genes are found in birds with aquatic behavior (also reported in 19). It is noteworthy,  
258 however, that quinolone resistance was only observed in birds near the WWTP, suggesting  
259 that these genes most likely derive from bacteria of human origin. One of the WWTP  
260 libraries also contained the *aac(6)-Ib-cr* gene (100% identity with clinical isolates), which  
261 confers resistance to quinolones and aminoglycosides and is often localized in multidrug  
262 resistance plasmids. First reported in Shanghai in 2003, this gene has already been found in  
263 several parts of the world, including in a recent report of multidrug-resistant *Salmonella* in  
264 Australia (7, 48, 49).

265 The distinct ecological niche and microbiome functioning of the different bird species  
266 analyzed here likely influences their acquisition of antibiotic resistant bacteria. Penguins and  
267 avocets hunt small aquatic animals, while ducks filter water and sediments to trap plant and  
268 animal material. It is possible that ducks ingest large amounts of bacteria while dabbling. In  
269 addition, birds may have historical-evolutionary associations with particular microbial  
270 species, resulting in a distinct microbiome composition and functioning across avian  
271 taxonomic groups. Indeed, a metabarcoding study showed that bird taxonomy explained  
272 most of the compositional variation in the microbiome of birds (50). Our functional analyses  
273 also suggest that the different bird orders harbor microbial communities with distinct  
274 metabolisms. The microbiome of Anseriformes (ducks) expressed genes encoding  
275 significantly different metabolic pathways compared with other birds, while there was no  
276 clear distinction among Charadriiformes and Sphenisciformes (Fig. S5, Table S5). It is  
277 therefore plausible that the high resistance gene expression in ducks from the WWTP is  
278 influenced by their distinct microbiome, which in turn reflects their ecological niche and  
279 established host-microbe associations. In this scenario, bird traits modulate (amplifying or  
280 diminishing) the human impact on the spread of resistance genes.

281 Migratory birds are of particular concern as they might spread antibiotic resistance  
282 across large geographic distances in the same way that they disperse pathogens (9, 11, 51,  
283 52). There are significant differences in gut microbiomes of migratory and resident red-  
284 necked stints (*Calidris ruficolis*) and curlew sandpipers (*Calidris furringea*), although these  
285 differences may be temporary (53, 54). Ruddy turnstones have a remarkable migration  
286 habit, travelling between breeding areas in Siberia to non-breeding sites in Australia via  
287 East-Asia, potentially acquiring and distributing resistant bacteria along the way. The  
288 turnstones analyzed here carried resistance against several antibiotic classes, but the

289 diversity of genes within those classes was much smaller than in birds at the WWTP (Fig. 1).  
290 *Anas* ducks travel hundreds of kilometers within Australia (55). It is possible that ducks from  
291 the Innamincka reserve have been in sites of high human impact previously, resulting in the  
292 higher load of resistance genes when compared with other birds from remote areas. It is  
293 also plausible that ducks acquire resistant bacteria due to their feeding behavior and the  
294 composition of their gut microbiome.

295 Despite their isolation, we found genes conferring resistance against four antibiotic  
296 classes in penguins from Antarctica. Previous studies of antibiotic resistance in penguins  
297 have produced contradictory results. In one, various tetracycline resistant bacteria were  
298 isolated from the cloaca of penguins (56), while in another high levels of resistance against  
299 multiple antibiotics were detected in penguin droppings (57). However, other studies have  
300 reported that antibiotic resistant bacteria are rare in these animals (24, 58, 59). It is possible  
301 that penguins acquire resistance genes from migratory fish and other prey or animals with  
302 which they interact. As antibiotics are naturally produced by bacteria, it is also possible that  
303 the resistance genes observed in the penguin microbiome occur in the environment  
304 regardless of human influence. The possibility of some cross-library and/or environmental  
305 contamination cannot be completely excluded. Nevertheless, the *bona fide* influence of  
306 human activity is supported by the larger number of resistance genes adjacent to the more  
307 populated O'Higgins Base compared with the much smaller González Videla Base.  
308 Additionally, previous research shows higher antibiotic resistance levels near research  
309 facilities compared to more pristine sites in Antarctica (24, 57). Increasing research  
310 activities, tourism and limited sewage treatment (60) are therefore the most likely  
311 explanation for the presence of antibiotic resistance in Antarctic penguins.

312 The bird microbiome expressed resistance against nine classes of antibiotics, even  
313 though we putatively enriched libraries with resistant bacterial strains using only two classes  
314 of antibiotics in the collection media (aminoglycoside and  $\beta$ -lactams, see Materials and  
315 Methods). Acquired (horizontally transferred) resistance genes can be constitutively  
316 expressed, in which case the presence of their transcripts is expected even without antibiotic  
317 exposure. It is also possible that these resistance genes were acting against antibiotics  
318 present in the environment and/or that these genes are co-transmitted with others that have  
319 functions in addition to antibiotic resistance (e.g. metal resistance, 61). Variables related to  
320 the ecology and geographic distribution of the different bird species could also play a role,  
321 although the results based on individual collection sites and bird taxonomic group show that  
322 these variables are unlikely to change the conclusion that birds from the WWTP carry the  
323 highest diversity and abundance of resistance genes. Meta-transcriptomic studies  
324 necessarily rely on reference databases, which limits the discovery of novel resistance  
325 genes (30), and the database used here (ResFinder, 62) does not include resistance that

326 arises through *de novo* mutation in the bacterial genome (which would increase the  
327 detection of false positives). Therefore, although we were limited to assessing acquired  
328 resistance genes, these genes residing on mobile elements pose greater public health risk  
329 as they can be transferred easily between bacteria (63). Potentially unequal RNA yields  
330 across libraries represent an additional caveat. We observed no correlation between library  
331 size or microbial mRNA reads and the diversity or abundance of resistance genes, indicating  
332 that the higher number of resistance genes observed in the WWTP does not result from  
333 unequal sequencing effort, or from failing to extract and sequence microbes from other sites  
334 (Fig. S6). Considering our rather conservative analyses (see Materials and Methods), it is  
335 possible that we underestimate the presence of some resistance genes that were not  
336 expressed or were expressed at low abundance.

337 In sum, we show that ducks feeding on wastewater are particularly prone to harbor  
338 bacteria with transcriptionally active antibiotic resistance genes. Ecological and functional  
339 traits are likely intertwined in explaining the higher propensity of ducks to carry antibiotic  
340 resistance genes. This study also contributes to the increasing literature reporting  
341 widespread antibiotic resistance in birds, even in isolated areas like the Australian outback  
342 and Antarctica. For antibiotic resistant bacteria, aquatic systems are major traffic routes  
343 between wildlife and humans (8, 64). The resistance genes acquired by birds can be re-  
344 introduced in the environment, possibly in other water systems (e.g. by migrating ducks) and  
345 might re-infect humans directly via contact with contaminated water, or indirectly by the  
346 introduction of these genes into the food chain (64). Investigating the mechanisms that  
347 sustain the persistence and cycling of resistance genes in wild populations despite the  
348 metabolic burden that these gene impose is a logical next step towards tackling antibiotic  
349 resistance.

350

## 351 **Materials and Methods**

352

### 353 *Sampling*

354 Samples were collected as part of long-term avian influenza virus surveillance studies (65-  
355 70). Ethics approvals, bird capture methods and sample handling are reported in the  
356 Supplementary Materials. In short, cloacal and oropharyngeal swabs were collected using a  
357 sterile-tipped applicator and placed in viral transport media (VTM, Brain-heart infusion broth  
358 containing 2x10<sup>6</sup> IU/l penicillin, 0.2mg/ml streptomycin, 0.5mg/ml gentamicin, 500U/ml  
359 amphotericin B, Sigma). VTM is a standard buffer used in avian influenza surveys and has  
360 the advantage of killing a portion of non-resistant bacterial strains. This step enriches meta-  
361 transcriptomes libraries with antibiotic resistant bacteria and, consequently, increases the  
362 sensitivity of the antibiotic resistance survey. As all samples were stored in VTM, there is no

363 reason to believe that this step would affect the abundance comparisons among libraries,  
364 and thus, it is unlikely to bias the results. All birds in this study were apparently healthy, with  
365 the exception of one library constructed from dead and dying shelducks with symptoms of  
366 Newcastle Disease. Samples were assayed for avian influenza virus as previously described  
367 (66). Samples were collected at sites with different levels of anthropogenic impact  
368 (Supplementary Materials). Birds sampled at the WWTP were found in lagoons composed of  
369 partially treated water (the final stage of wastewater treatment).

370

#### 371 *RNA-sequencing and data processing*

372 RNA isolation procedures are detailed in the Supplementary Materials. Libraries were  
373 composed of 10 conspecific bird samples pooled at equal concentrations. Paired-end  
374 sequencing (100bp) was performed on a HiSeq2500 platform and the number of reads  
375 obtained are reported in Table S1. Low quality reads, adapters, host reads and ribosomal  
376 RNA were filtered out from the data set (Supplementary Materials).

377

#### 378 *Resistance genes characterization*

379 The ResFinder reference database (62) was used in conjunction with the KMA program (71)  
380 (downloaded in December 2017) to identify resistance genes in the meta-transcriptomic data  
381 set. The ResFinder database currently contains 2255 resistance genes compiled from  
382 published manuscripts and existing databases. KMA was preferred over other alignment  
383 tools because it performs well in aligning short reads against highly redundant databases  
384 and is able to resolve non-unique read matches by assessing and statistically testing global  
385 alignment scores. To minimize the risk of false-positives and increase the minimum mapping  
386 length allowed, only genes with a mapping coverage greater than 20% were considered in  
387 the analyses, all of which had an alignment  $p$ -value  $\ll 0.05$ . The average length of the  
388 resistance genes observed was 944bp – a gene with this length was only considered in the  
389 downstream analyses if query reads overlapped by at least 189 bp (20% coverage). This  
390 approach is highly conservative because it uses an aligner that yields a minimal number of  
391 false positives (71), does not include housekeeping genes (which would increase the  
392 occurrence of false positives), and defines resistance genes based on gene fragments (at  
393 least 20% of the genes) rather than individual reads. The gene fragments analyzed here are  
394 longer than the ones obtained via qPCR (generally 100bp amplicons), which are widely used  
395 in AMR assessments of environmental samples and in diagnostic laboratories. One gene  
396 (*bla*<sub>TEM-116</sub>) was observed in all libraries but was removed from the analyses due to its  
397 potential contaminant nature (72). It is possible that the data set contains other laboratory  
398 contaminants, but the fact that one of the libraries contained only one resistance gene, and  
399 that no other gene (except for *bla*<sub>TEM-116</sub>) was found in all libraries, suggests that

400 contamination is unlikely. Genes conferring resistance to Macrolide, Lincosamide and  
401 Streptogramin B were considered as one antibiotic class (MLS). Absolute read abundances  
402 were estimated based on a stably expressed host gene and normalized for gene length  
403 (Supplementary Materials). The number of antibiotic classes to which resistance was found,  
404 the diversity (i.e. number of genes) and the abundance of resistance genes in each library  
405 were classified into two bins ('WWTP' and 'Other', Fig. 2). Differences between WWTP and  
406 other sites were tested with a Kruskal-Wallis test using the native *stats* R package (R Core  
407 Team 73). The higher diversity of resistance genes in libraries from the WWTP was  
408 validated with a PCR-based approach targeting resistance genes in individual birds from two  
409 libraries (n=20, Supplementary Materials).

410

#### 411 *Functional profiling*

412 The microorganism-based functional profile was inferred with HUMAnN2 (74)  
413 (<http://huttenhower.sph.harvard.edu/humann2>), using the UniRef90 protein database as  
414 reference (75). Community-level differences in expression of pathways between sites and  
415 bird orders was visually assessed with Principal Coordinate Analysis based on an Euclidean  
416 distance matrix with the *ape* R package (76) and further investigated with Random Forest  
417 analysis, using 1000 trees, with the *randomForest* R package (77).

418

#### 419 **Acknowledgments**

420 The sampling was supported by NIAID (HHSN266200700010C), ARC discovery grants (DP  
421 130101935 and DP160102146) and the Instituto Chileno Antártico INACH (T 12-13 and T  
422 27-10). The Melbourne WHO Collaborating Centre for Reference and Research on Influenza  
423 is supported by the Australian Department of Health. ECH is funded by an ARC Australian  
424 Laureate Fellowship (FL170100022). TCS is a Sydney Medical Foundation Fellow whose  
425 work is also supported by the Sydney Medical School Foundation. JRI is supported by a  
426 NHMRC Practitioner Fellowship (GNT1104232). We thank the High Performance Computing  
427 team at Sydney University, the genomic facilities at the Westmead Institute for Medical  
428 Research, the Centre for Integrative Ecology at Deakin University, the Victorian Wader  
429 Study Group, and the logistic support from Melbourne Water, Innamincka Station and  
430 Innamincka Regional Reserve. We also thank Sebastiaan van Hal, Sally Partridge,  
431 Ali Khalid, Philip Clausen, Simeon Lisovski and Marta Ferenczi for their support.

432

#### 433 **Authors' contributions**

434 VRM, MW and ECH designed the research. MW, DG-A and MK collected samples. MW  
435 carried out DNA/RNA isolation and meta-transcriptome library preparation. VRM and J-SE  
436 performed PCRs. VRM performed the data analyses. ACH, DG-A, MK, TCS and ECH



437 contributed with reagents and/or funds for research. All authors contributed to interpreting  
438 data and manuscript writing. All authors gave final approval for publication.

439

440

## 441 **References**

442

- 443 1. Van Boeckel TP, *et al.* (2017) Reducing antimicrobial use in food animals. *Science*  
444 357(6358):1350-1352.
- 445 2. Klein EY, *et al.* (2018) Global increase and geographic convergence in antibiotic  
446 consumption between 2000 and 2015. *Proc Natl Acad Sci U S A* 115(15):E3463-  
447 E3470.
- 448 3. O'Neill J (2016) Tackling drug-resistant infections globally: final report and  
449 recommendations. (amr-review.org).
- 450 4. D'Costa VM, *et al.* (2011) Antibiotic resistance is ancient. *Nature* 477(7365):457-461.
- 451 5. Bhullar K, *et al.* (2012) Antibiotic resistance is prevalent in an isolated cave  
452 microbiome. *PLoS One* 7(4):e34953.
- 453 6. Harmer CJ & Hall RM (2015) The A to Z of A/C plasmids. *Plasmid* 80:63-82.
- 454 7. Crofts TS, Gasparrini AJ, & Dantas G (2017) Next-generation approaches to  
455 understand and combat the antibiotic resistome. *Nat. Rev. Microbiol.* 15(7):422-434.
- 456 8. Vittecoq M, *et al.* (2016) Antimicrobial resistance in wildlife. *J. Appl. Ecol.* 53(2):519-  
457 529.
- 458 9. Surette MD & Wright GD (2017) Lessons from the environmental antibiotic  
459 resistome. *Annu. Rev. Microbiol.* 71:309-329.
- 460 10. Stedt J, *et al.* (2014) Antibiotic resistance patterns in *Escherichia coli* from gulls in  
461 nine European countries. *Infect Ecol Epidemiol* 4.
- 462 11. Bauer S & Hoyer BJ (2014) Migratory animals couple biodiversity and ecosystem  
463 functioning worldwide. *Science* 344(6179):1242552.
- 464 12. Atterby C, *et al.* (2016) Increased prevalence of antibiotic-resistant *E. coli* in gulls  
465 sampled in Southcentral Alaska is associated with urban environments. *Infect Ecol*  
466 *Epidemiol* 6:32334.
- 467 13. Stedt J, *et al.* (2015) Carriage of CTX-M type extended spectrum beta-lactamases  
468 (ESBLs) in gulls across Europe. *Acta Vet Scand* 57:74.
- 469 14. Hasan B, *et al.* (2012) Antimicrobial drug-resistant *Escherichia coli* in wild birds and  
470 free-range poultry, Bangladesh. *Emerg Infect Dis* 18(12):2055-2058.
- 471 15. Atterby C, *et al.* (2017) ESBL-producing *Escherichia coli* in Swedish gulls-A case of  
472 environmental pollution from humans? *PLoS One* 12(12):e0190380.
- 473 16. Hernandez J, *et al.* (2013) Characterization and comparison of extended-spectrum  
474 beta-lactamase (ESBL) resistance genotypes and population structure of *Escherichia*  
475 *coli* isolated from Franklin's gulls (*Leucophaeus pipixcan*) and humans in Chile. *PLoS*  
476 *One* 8(9):e76150.
- 477 17. Martiny AC, Martiny JB, Weihe C, Field A, & Ellis JC (2011) Functional  
478 metagenomics reveals previously unrecognized diversity of antibiotic resistance  
479 genes in gulls. *Front. Microbiol.* 2:238.



- 480 18. Dolejska M, Cizek A, & Literak I (2007) High prevalence of antimicrobial-resistant  
481 genes and integrons in *Escherichia coli* isolates from Black-headed Gulls in the  
482 Czech Republic. *J. Appl. Microbiol.* 103(1):11-19.
- 483 19. Veldman K, van Tulden P, Kant A, Testerink J, & Mevius D (2013) Characteristics of  
484 cefotaxime-resistant *Escherichia coli* from wild birds in the Netherlands. *Appl.*  
485 *Environ. Microbiol.* 79(24):7556-7561.
- 486 20. Ahlstrom CA, *et al.* (2018) Acquisition and dissemination of cephalosporin-resistant  
487 *E. coli* in migratory birds sampled at an Alaska landfill as inferred through genomic  
488 analysis. *Sci. Rep.* 8(1):7361.
- 489 21. Chu BTT, *et al.* (2017) Metagenomic analysis reveals the impact of wastewater  
490 treatment plants on the dispersal of microorganisms and genes in aquatic sediments.  
491 *Appl. Environ. Microbiol.*
- 492 22. Pehrsson EC, *et al.* (2016) Interconnected microbiomes and resistomes in low-  
493 income human habitats. *Nature* 533(7602):212-216.
- 494 23. Zhang XX, Zhang T, & Fang HH (2009) Antibiotic resistance genes in water  
495 environment. *Appl. Microbiol. Biotechnol.* 82(3):397-414.
- 496 24. Rabbia V, *et al.* (2016) Antibiotic resistance in *Escherichia coli* strains isolated from  
497 Antarctic bird feces, water from inside a wastewater treatment plant, and seawater  
498 samples collected in the Antarctic Treaty area. *Polar Science* 10(2):123-131.
- 499 25. Rodriguez-Mozaz S, *et al.* (2015) Occurrence of antibiotics and antibiotic resistance  
500 genes in hospital and urban wastewaters and their impact on the receiving river.  
501 *Water Res.* 69:234-242.
- 502 26. Mohammadali M & Davies J (2017) Antimicrobial Resistance Genes and Wastewater  
503 Treatment. *Antimicrobial Resistance in Wastewater Treatment Processes*, eds Keen  
504 PL & Fugère R), pp 1-13.
- 505 27. Zhu YG, *et al.* (2017) Continental-scale pollution of estuaries with antibiotic  
506 resistance genes. *Nat Microbiol* 2:16270.
- 507 28. Zhao Y, *et al.* (2017) Feed additives shift gut microbiota and enrich antibiotic  
508 resistance in swine gut. *Sci. Total Environ.*
- 509 29. Zhu YG, *et al.* (2013) Diverse and abundant antibiotic resistance genes in Chinese  
510 swine farms. *Proc Natl Acad Sci U S A* 110(9):3435-3440.
- 511 30. Bengtsson-Palme J, Larsson DGJ, & Kristiansson E (2017) Using metagenomics to  
512 investigate human and environmental resistomes. *J. Antimicrob. Chemother.*  
513 72(10):2690-2703.
- 514 31. Su JQ, *et al.* (2017) Metagenomics of urban sewage identifies an extensively shared  
515 antibiotic resistome in China. *Microbiome* 5(1):84.
- 516 32. Munk P, *et al.* (2018) Abundance and diversity of the faecal resistome in slaughter  
517 pigs and broilers in nine European countries. *Nat Microbiol* 3(8):898-908.
- 518 33. Mira A, Ochman H, & Moran NA (2001) Deletional bias and the evolution of bacterial  
519 genomes. *Trends Genet.* 17:589-596.
- 520 34. Hessen DO, Jeyasingh PD, Neiman M, & Weider LJ (2010) Genome streamlining  
521 and the elemental costs of growth. *Trends Ecol. Evol.* 25(2):75-80.
- 522 35. Marcelino VR, Cremen MC, Jackson CJ, Larkum AWD, & Verbruggen H (2016)  
523 Evolutionary dynamics of chloroplast genomes in low light: a case study of the  
524 endolithic green alga *Ostreobium quekettii*. *Genome Biol. Evol.* 8(9):2939-2951.

- 525 36. Wolf YI & Koonin EV (2013) Genome reduction as the dominant mode of evolution.  
526 *Bioessays* 35(9):829-837.
- 527 37. Versluis D, *et al.* (2015) Mining microbial metatranscriptomes for expression of  
528 antibiotic resistance genes under natural conditions. *Sci. Rep.* 5:11981.
- 529 38. Rowe WPM, *et al.* (2017) Overexpression of antibiotic resistance genes in hospital  
530 effluents over time. *J. Antimicrob. Chemother.* 72(6):1617-1623.
- 531 39. Paliy O & Shankar V (2016) Application of multivariate statistical techniques in  
532 microbial ecology. *Mol. Ecol.* 25(5):1032-1057.
- 533 40. Ganz HH, *et al.* (2017) Community-level differences in the microbiome of healthy wild  
534 mallards and those infected by influenza A viruses. *mSystems* 2(1).
- 535 41. Walsh C (2000) Molecular mechanisms that confer antibacterial drug resistance.  
536 *Nature* 406(6797):775-781.
- 537 42. D'Andrea MM, Arena F, Pallecchi L, & Rossolini GM (2013) CTX-M-type beta-  
538 lactamases: a successful story of antibiotic resistance. *Int. J. Med. Microbiol.* 303(6-  
539 7):305-317.
- 540 43. Falagas ME, Grammatikos AP, & Michalopoulos A (2008) Potential of old-generation  
541 antibiotics to address current need for new antibiotics. *Expert Rev Anti Infect Ther*  
542 6(5):593-600.
- 543 44. Arcangioli MA, Leroy-Setrin S, Martel JL, & Chaslus-Dancla E (1999) A new  
544 chloramphenicol and florfenicol resistance gene flanked by two integron structures in  
545 *Salmonella typhimurium* DT104. *FEMS Microbiol. Lett.* 174(2):327-332.
- 546 45. Cloeckaert A, *et al.* (2000) Plasmid-mediated florfenicol resistance encoded by the  
547 floR gene in *Escherichia coli* isolated from cattle. *Antimicrob. Agents Chemother.*  
548 44(10):2858-2860.
- 549 46. Berendsen BJA, *et al.* (2018) The persistence of a broad range of antibiotics during  
550 calve, pig and broiler manure storage. *Chemosphere* 204:267-276.
- 551 47. Poirel L, Cattoir V, & Nordmann P (2012) Plasmid-mediated quinolone resistance;  
552 interactions between human, animal, and environmental ecologies. *Front. Microbiol.*  
553 3:24.
- 554 48. Arnott A, *et al.* (2018) Multidrug-Resistant *Salmonella enterica* 4,[5],12:i:- Sequence  
555 Type 34, New South Wales, Australia, 2016-2017. *Emerg Infect Dis* 24(4):751-753.
- 556 49. Robicsek A, *et al.* (2006) Fluoroquinolone-modifying enzyme: a new adaptation of a  
557 common aminoglycoside acetyltransferase. *Nat. Med.* 12(1):83-88.
- 558 50. Hird SM, Sanchez C, Carstens BC, & Brumfield RT (2015) Comparative Gut  
559 Microbiota of 59 Neotropical Bird Species. *Front. Microbiol.* 6:1403.
- 560 51. Altizer S, Bartel R, & Han BA (2011) Animal migration and infectious disease risk.  
561 *Science* 331(6015):296-302.
- 562 52. Fourment M, Darling AE, & Holmes EC (2017) The impact of migratory flyways on  
563 the spread of avian influenza virus in North America. *BMC Evol. Biol.* 17(1):118.
- 564 53. Risely A, Waite DW, Ujvari B, Hoyer BJ, & Klaassen M (2017) Active migration is  
565 associated with specific and consistent changes to gut microbiota in *Calidris*  
566 shorebirds. *J. Anim. Ecol.*
- 567 54. Risely A, Waite D, Ujvari B, Klaassen M, & Hoyer B (2017) Gut microbiota of a long-  
568 distance migrant demonstrates resistance against environmental microbe incursions.  
569 *Mol. Ecol.* 26(20):5842-5854.

- 570 55. Roshier D, Asmus M, & Klaassen M (2008) What drives long-distance movements in  
571 the nomadic Grey Teal *Anas gracilis* in Australia? *Ibis* 150(3):474-484.
- 572 56. Rahman MH, Sakamoto KQ, Kitamura S-I, Nonaka L, & Suzuki S (2015) Diversity of  
573 tetracycline-resistant bacteria and resistance gene tet(M) in fecal microbial  
574 community of Adélie penguin in Antarctica. *Polar Biol.* 38(10):1775-1781.
- 575 57. Miller RV, Gammon K, & Day MJ (2009) Antibiotic resistance among bacteria  
576 isolated from seawater and penguin fecal samples collected near Palmer Station,  
577 Antarctica. *Can J Microbiol* 55(1):37-45.
- 578 58. Bonnedahl J, *et al.* (2008) Antibiotic susceptibility of faecal bacteria in Antarctic  
579 penguins. *Polar Biol.* 31(6):759-763.
- 580 59. Hernandez J, *et al.* (2012) Human-associated extended-spectrum beta-lactamase in  
581 the Antarctic. *Appl. Environ. Microbiol.* 78(6):2056-2058.
- 582 60. Gröndahl F, Sidenmark J, & Thomsen A (2016) Survey of waste water disposal  
583 practices at Antarctic research stations. *Polar Res.* 28(2):298-306.
- 584 61. Baker-Austin C, Wright MS, Stepanauskas R, & McArthur JV (2006) Co-selection of  
585 antibiotic and metal resistance. *Trends Microbiol.* 14(4):176-182.
- 586 62. Zankari E, *et al.* (2012) Identification of acquired antimicrobial resistance genes. *J.*  
587 *Antimicrob. Chemother.* 67(11):2640-2644.
- 588 63. Martinez JL, Coque TM, & Baquero F (2015) What is a resistance gene? Ranking  
589 risk in resistomes. *Nat. Rev. Microbiol.* 13(2):116-123.
- 590 64. Taylor NG, Verner-Jeffreys DW, & Baker-Austin C (2011) Aquatic systems:  
591 maintaining, mixing and mobilising antimicrobial resistance? *Trends Ecol. Evol.*  
592 26(6):278-284.
- 593 65. Ferenczi M (2016) Avian influenza virus dynamics in Australian wild birds. PhD.  
594 (Deakin University).
- 595 66. Ferenczi M, *et al.* (2016) Avian influenza infection dynamics under variable climatic  
596 conditions, viral prevalence is rainfall driven in waterfowl from temperate, south-east  
597 Australia. *Vet Res* 47:23.
- 598 67. Hurt AC, *et al.* (2014) Detection of evolutionarily distinct avian influenza A viruses in  
599 antarctica. *MBio* 5(3):e01098-01014.
- 600 68. Hurt AC, *et al.* (2016) Evidence for the introduction, reassortment, and persistence of  
601 diverse influenza A viruses in Antarctica. *J. Virol.* 90(21):9674-9682.
- 602 69. Grillo VL, *et al.* (2015) Avian influenza in Australia: a summary of 5 years of wild bird  
603 surveillance. *Aust. Vet. J.* 93(11):387-393.
- 604 70. González-Acuña D, *et al.* (2013) Health evaluation of wild gentoo penguins  
605 (*Pygoscelis papua*) in the Antarctic Peninsula. *Polar Biol.* 36(12):1749-1760.
- 606 71. Clausen P, Aarestrup FM, & Lund O (2018) Rapid and precise alignment of raw  
607 reads against redundant databases with KMA. *BMC Bioinformatics* 19(1):307.
- 608 72. Jacoby GA & Bush K (2016) The Curious Case of TEM-116. *Antimicrob. Agents*  
609 *Chemother.* 60(11):7000.
- 610 73. R Core Team (2013) *R: A language and environment for statistical computing*  
611 (Vienna, Austria.).
- 612 74. Abubucker S, *et al.* (2012) Metabolic reconstruction for metagenomic data and its  
613 application to the human microbiome. *PLoS Comput Biol* 8(6):e1002358.

- 614 75. Suzek BE, *et al.* (2015) UniRef clusters: a comprehensive and scalable alternative  
615 for improving sequence similarity searches. *Bioinformatics* 31(6):926-932.
- 616 76. Paradis E, Claude J, & Strimmer K (2004) APE: analyses of phylogenetics and  
617 evolution in R language. *Bioinformatics* 20:289-290.
- 618 77. Liaw A & Wiener M (2002) Classification and regression by randomForest. *R News*  
619 2(3):18-22.
